# Supplementary material
Source: PubMed Central journal article supplement (PMC4221574)
Supplement: NIHMS587908-supplement-Supp_FigureS1-S4.pdf [file NIHMS587908-supplement-Supp_FigureS1-S4.pdf]

**"No motion" data****"With motion" data****Pre-contrast**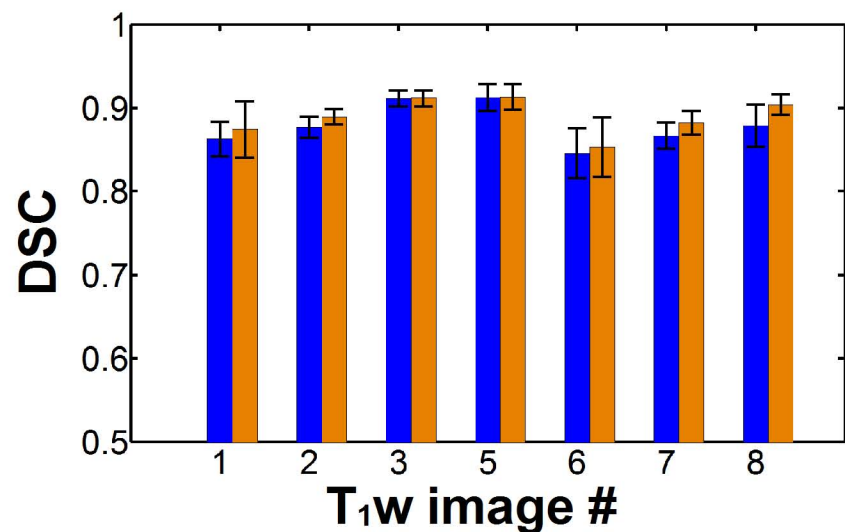**(a)**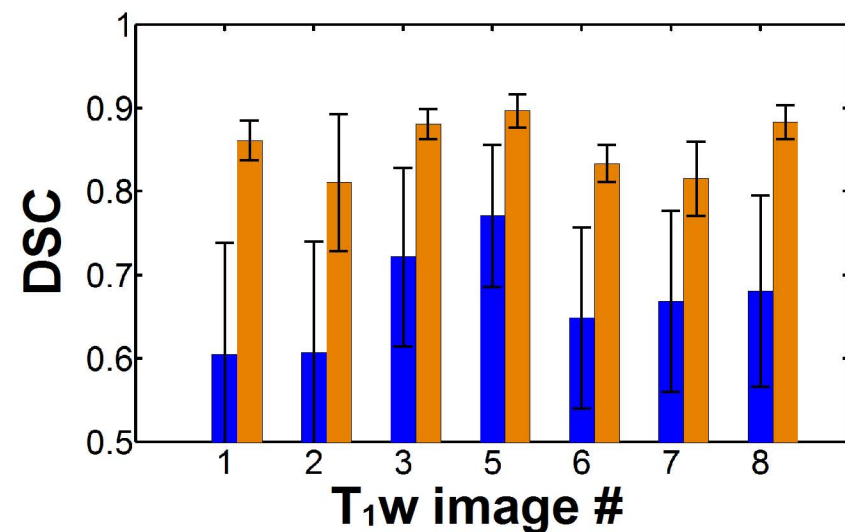**(b)****Post-Contrast (~15 min)**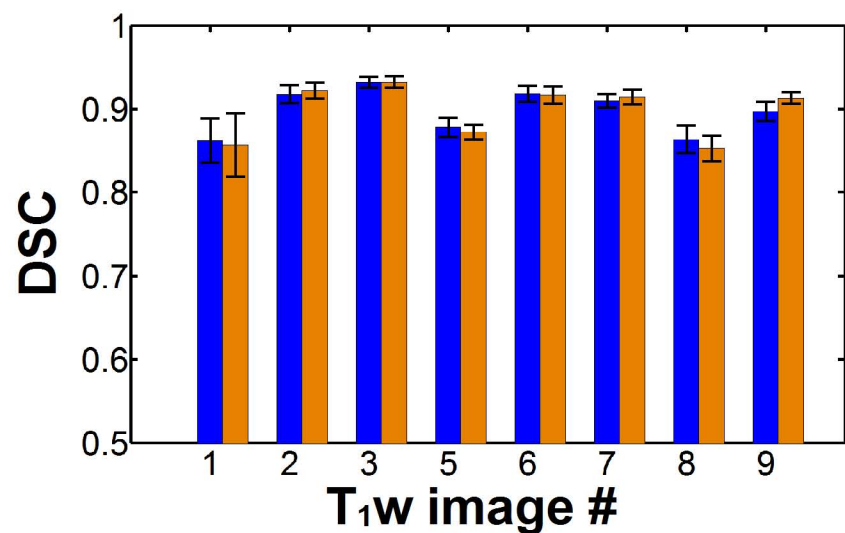**(c)**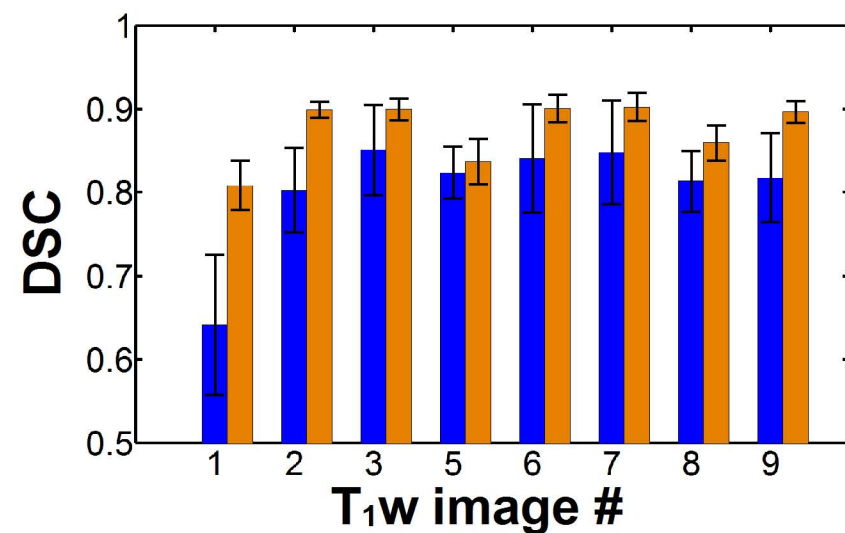**(d)****Post-Contrast (~30 min)**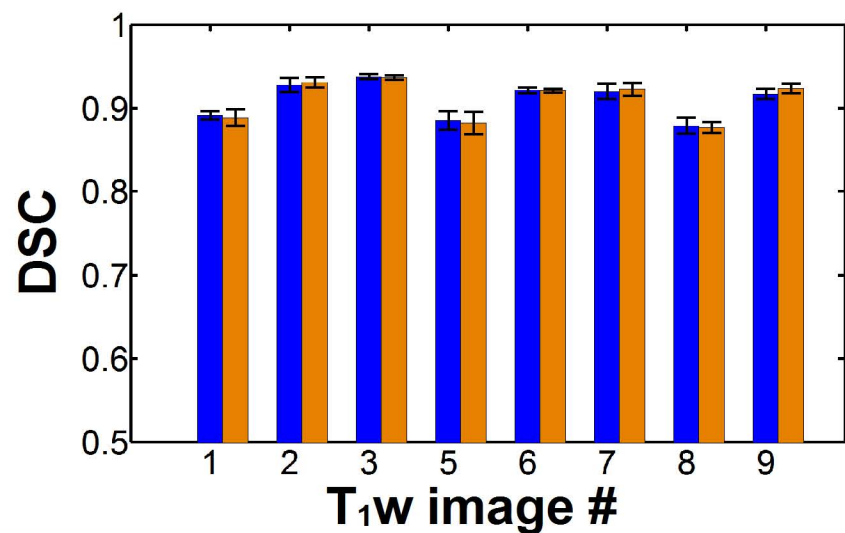**(e)**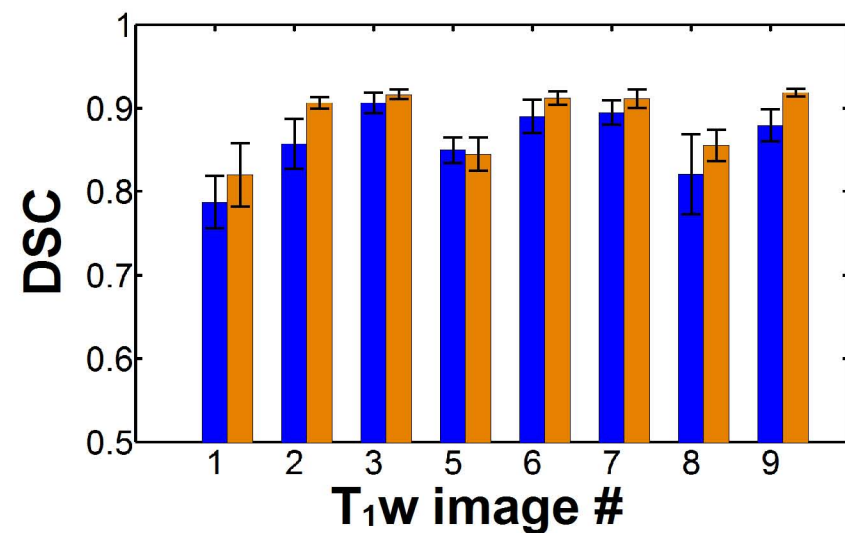**(f)**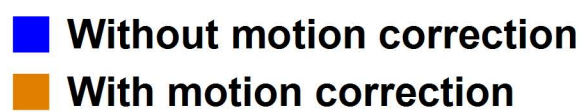

**"No motion" data****"With motion" data****Pre-contrast**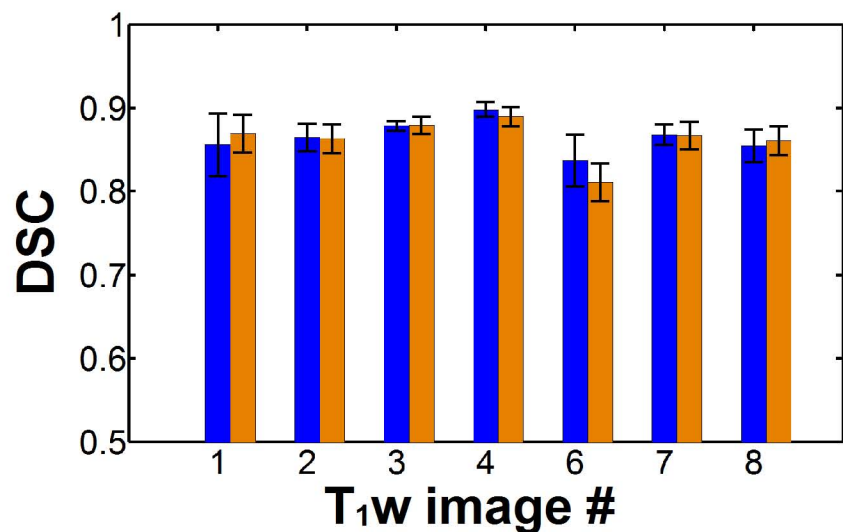**(a)**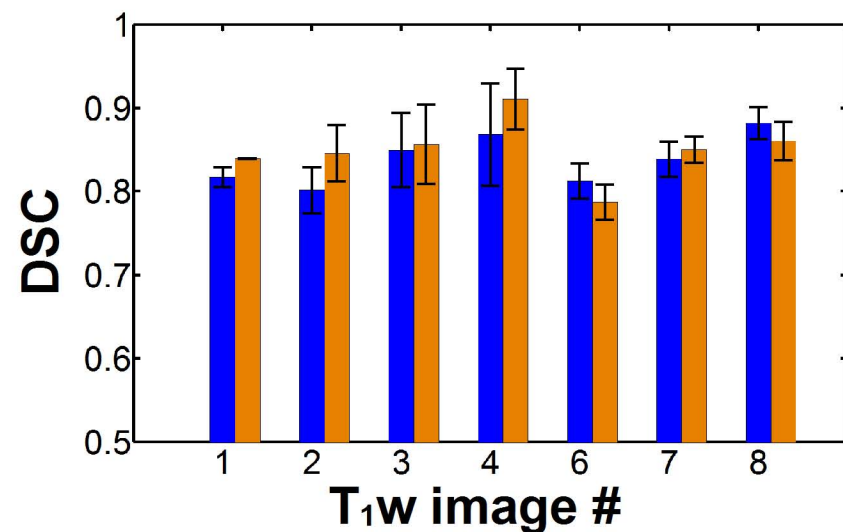**(b)****Post-Contrast (~15 min)**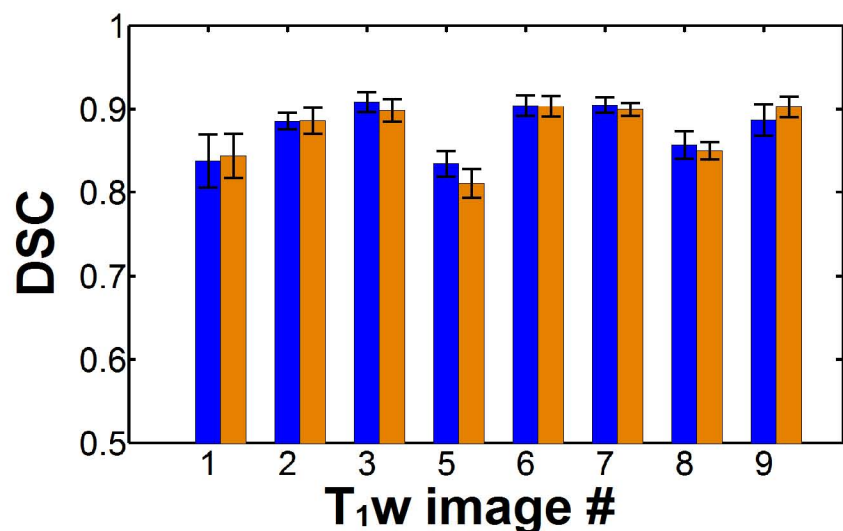**(c)**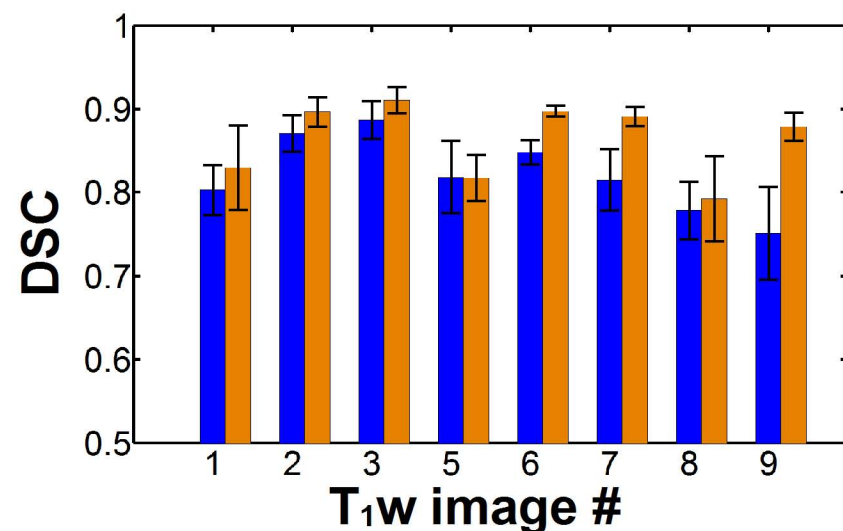**(d)****Post-Contrast (~30 min)**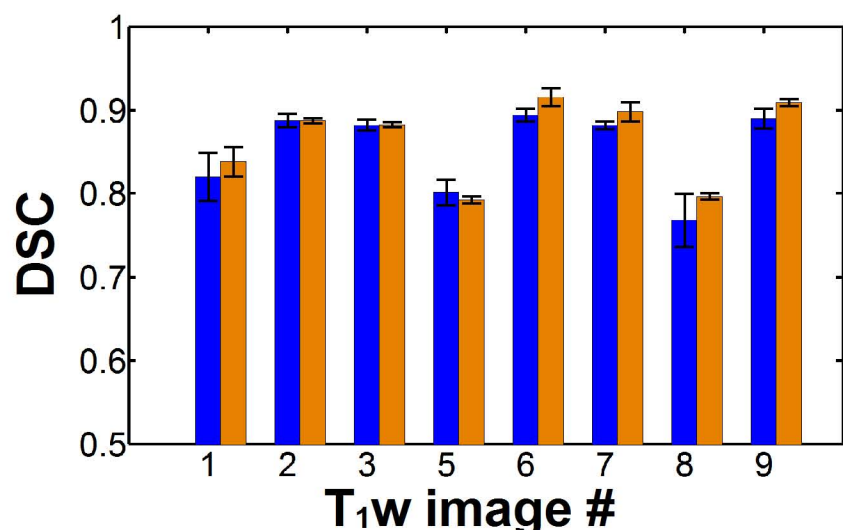**(e)**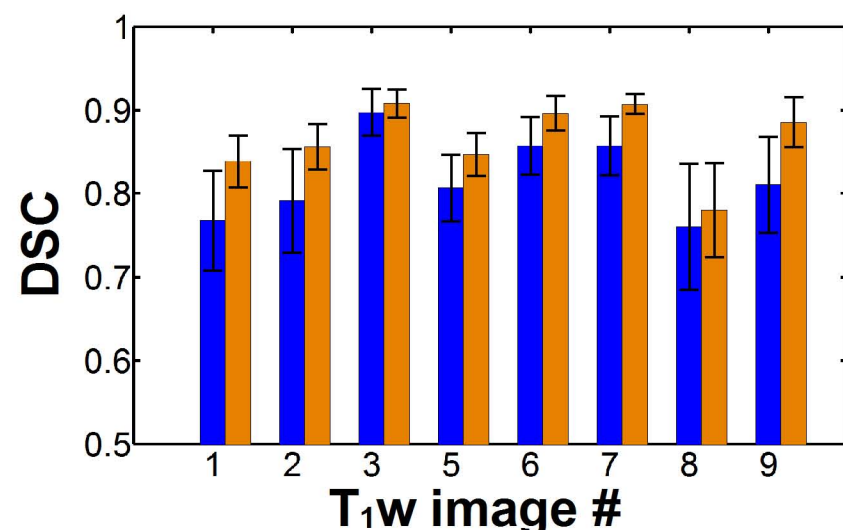**(f)**

■ Without motion correction  
■ With motion correction

**"No motion" data****"With motion" data****Pre-contrast**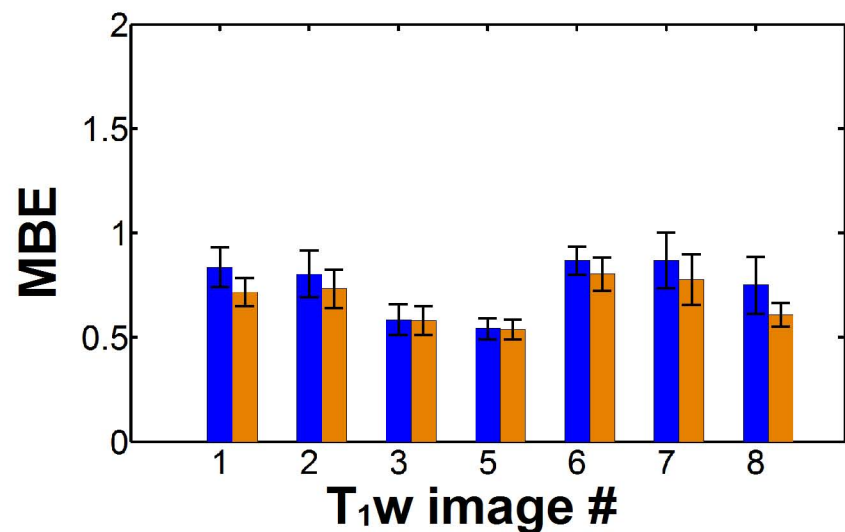**(a)**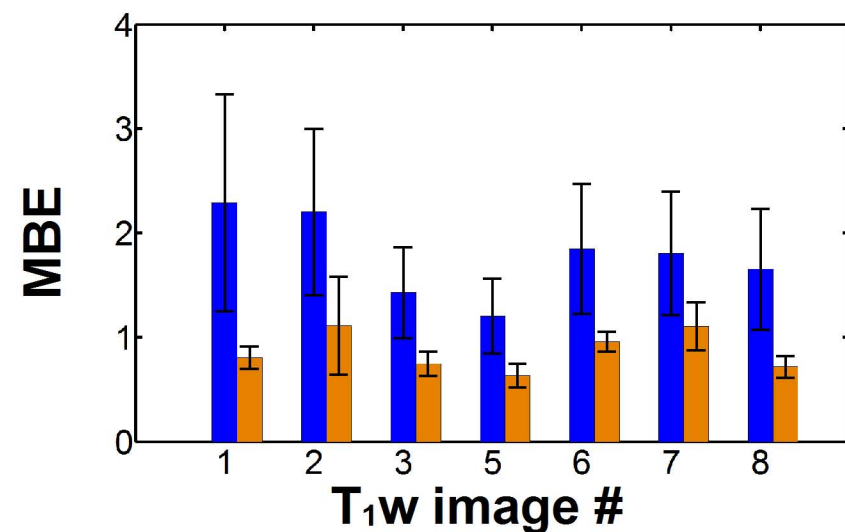**(b)****Post-Contrast (~15 min)**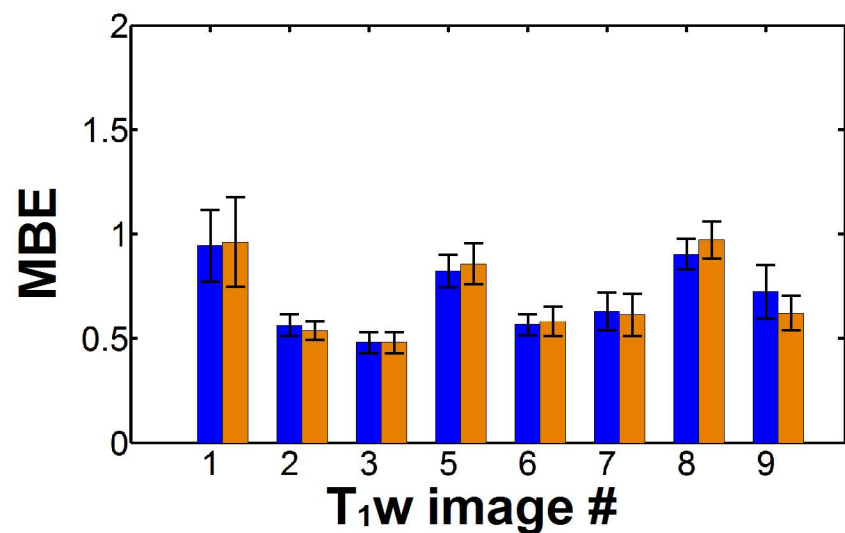**(c)**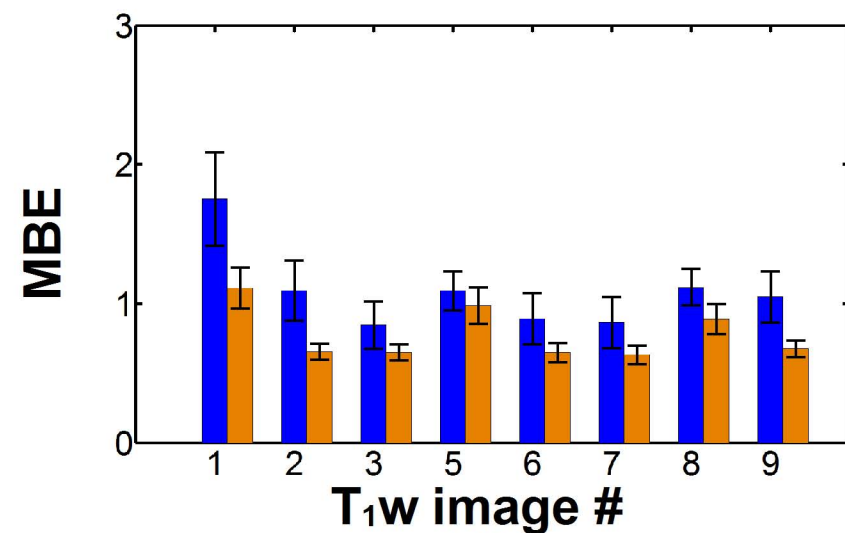**(d)****Post-Contrast (~30 min)**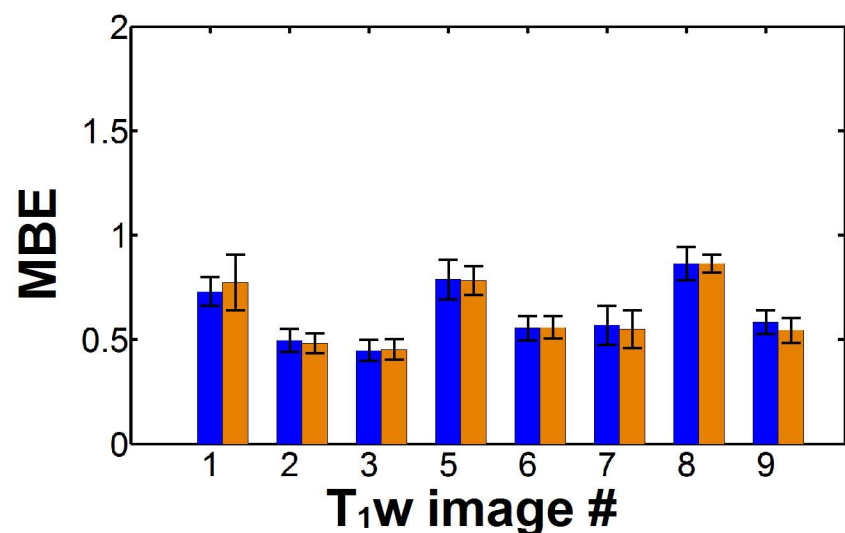**(e)**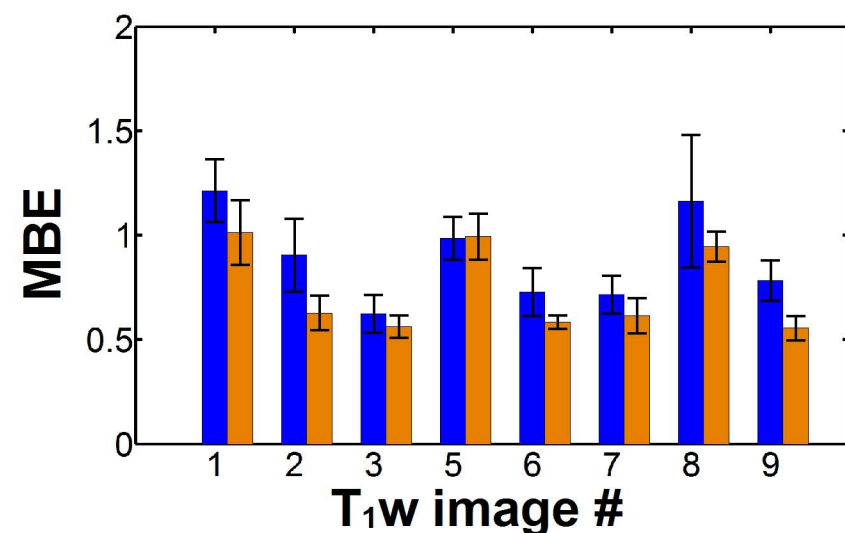**(f)**

■ Without motion correction  
■ With motion correction

**"No motion" data****"With motion" data****Pre-contrast**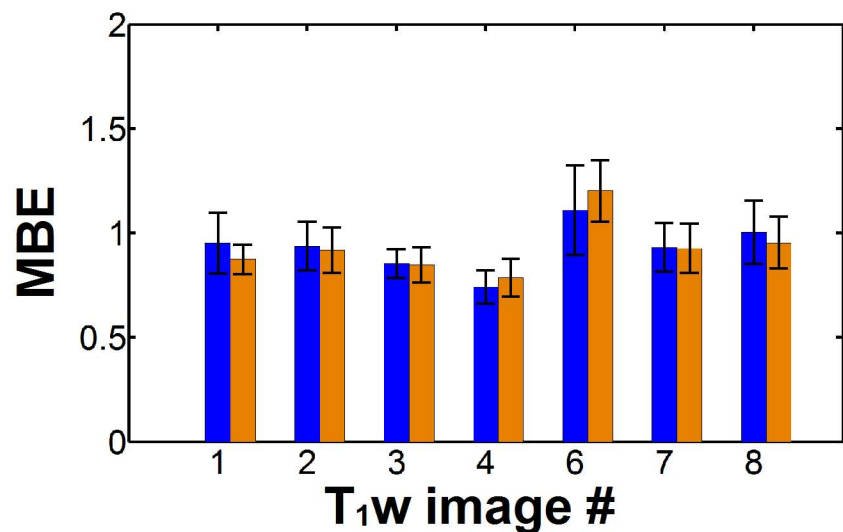**(a)**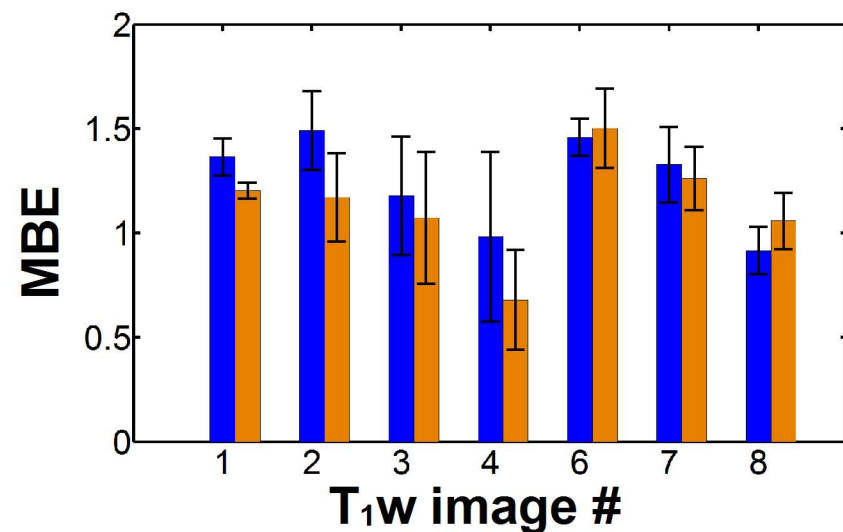**(b)****Post-Contrast (~15 min)**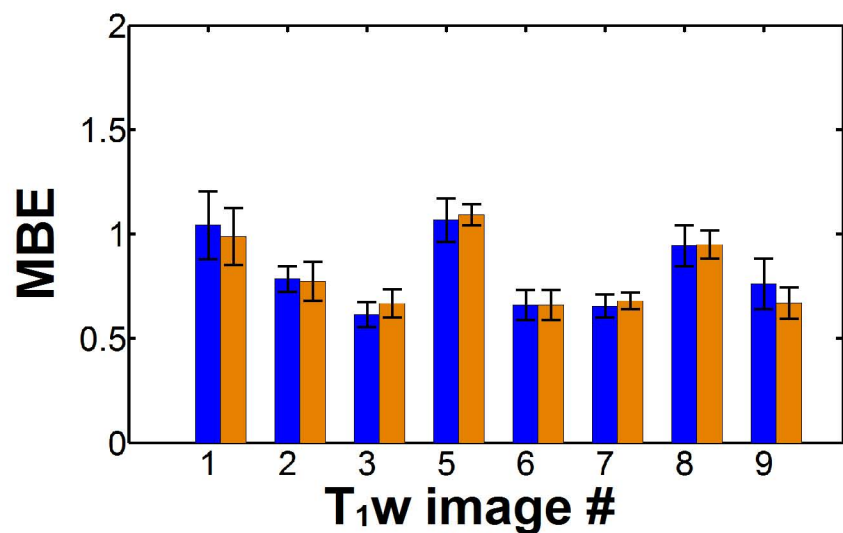**(c)**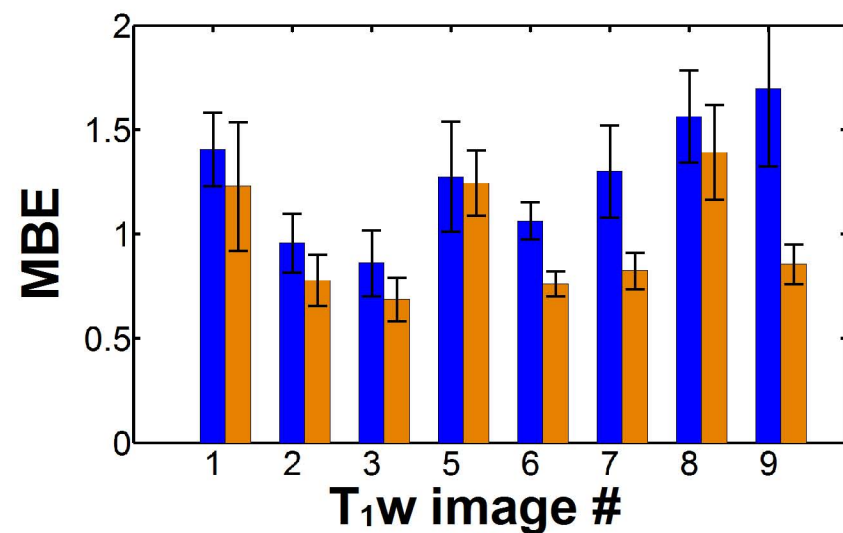**(d)****Post-Contrast (~30 min)**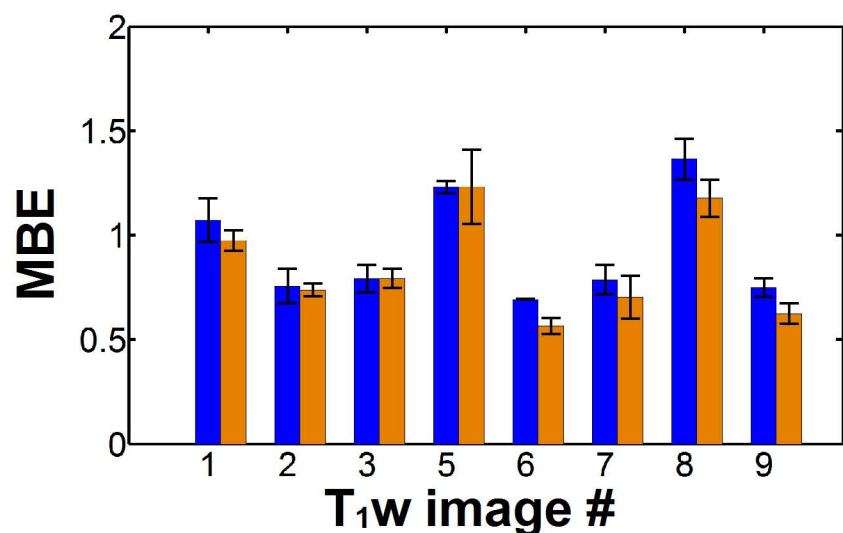**(e)**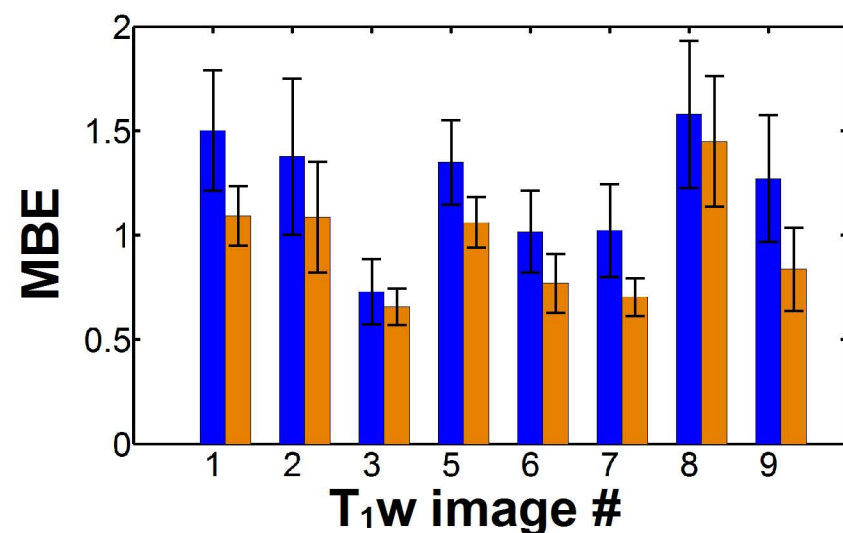**(f)**

■ Without motion correction  
■ With motion correction
